# Supplementary material for: Epidemiology of Bovine Tuberculosis and Its Zoonotic Implication in Addis Ababa Milkshed, Central Ethiopia
Source: Frontiers journal article supplement (doi:10.3389/fvets.2021.595511), 2021-02-17
Supplement: Table_1.DOCX [file Table_1.DOCX]

Table 1: Herd and animal prevalences of bTB using SICCT test at >4.0mm cut-off.

| bTB Status | Level | Locations | | | | | | | | | | Total | |
| --- | --- | --- | --- | --- | --- | --- | --- | --- | --- | --- | --- | --- | --- |
| Chancho | | Laga-Tafo | | Muka-Turi | | Sandafa | | Sululta | |
| No. | % | No. | % | No. | % | No. | % | No. | % | No. | Prevalence (95 % CI) |
| Negative | Herd | 4 | 44.4 | 3 | 42.9 | 5 | 83.3 | 7 | 26.9 | 8 | 47.1 | 27 | 41.5 [30.8-53.8] |
| Animal | 60 | 88.2 | 47 | 63.5 | 32 | 82.1 | 172 | 51.2 | 86 | 62.8 | 397 | 60.7 [56.9-64.7] |
| Positive | Herd | 5 | 55.6 | 4 | 57.1 | 1 | 16.7 | 19 | 73.1 | 9 | 52.9 | 38 | 58.5 [46.2-96.2] |
| Animal | 8 | 11.8 | 27 | 36.5 | 7 | 17.9 | 164 | 48.8 | 51 | 37.2 | 257 | 39.3 [35.3-43.1] |
