# Supplementary material for: Epidemiology of Bovine Tuberculosis and Its Zoonotic Implication in Addis Ababa Milkshed, Central Ethiopia
Source: Frontiers journal article supplement (doi:10.3389/fvets.2021.595511), 2021-02-17
Supplement: Table_2.DOCX [file Table_2.DOCX]

Table 2: Risk factors associated with bTB in selected dairy farms in the Addis Ababa milkshed, central Ethiopia.

| **Risk factors** | | **Total (%)** | **bTB status** | | | | |
| --- | --- | --- | --- | --- | --- | --- | --- |
| **N (%) positive** | **Crude OR [95% CI]** | **P value** | **Adjusted OR [95% CI]** | **P value** |
| Locations | Chancho | 9 (13.8) | 5 (13.2) | 1 |  | - |  |
|  | Laga-Tafo | 7 (10.8) | 4 (10.5) | 1.1[0.1-7.8] | 0.949 | - | - |
|  | Muka-Turi | 6 (9.2) | 1 (2.6) | 0.2[0.01-1.9] | 0.154 | - | - |
|  | Sandafa | 26 (40.0) | 19 (50.0) | 2.2[0.4-10.5] | 0.334 | - | - |
|  | Sululta | 17 (26.2) | 9 (23.7) | 0.9[0.2-4.5] | 0.899 | - | - |
| Farm type | Traditional | 44 (67.7) | 20 (52.6) | 1 |  | - | - |
| Commercial | 21 (32.3) | 18 (47.4) | 7.2[1.8-28.0] | 0.004 | - | - |
| Management condition | Good | 15 (23.1) | 6 (15.8) | 1 |  | 1 |  |
| Medium | 17 (26.2) | 13 (34.2) | 4.8[1.1-22.4] | 0.042 | 9.0[1.1-73.2] | 0.040 |
| Poor | 33 (50.8) | 19 (50.0) | 2.0[0.6-7.1] | 0.262 | 6.7[1.0-43.1] | 0.045 |
| Herd size | Small (< 10 animals) | 21 (32.3) | 8 (21.1) | 1 |  | - | - |
| Medium (11-50 animals) | 29 (44.6) | 16 (42.1) | 2.0[0.6-6.2] | 0.235 | - | - |
| Large (> 50 animals) | 15 (23.1) | 14 (36.8) | 22.7[2.5-207.7] | 0.006 | - | - |
