# Supplementary material for: Epidemiology of Bovine Tuberculosis and Its Zoonotic Implication in Addis Ababa Milkshed, Central Ethiopia
Source: Frontiers journal article supplement (doi:10.3389/fvets.2021.595511), 2021-02-17
Supplement: Table_3.DOCX [file Table_3.DOCX]

Table 3: Risk factors associated with bTB positive animals from selected dairy farms in the Addis Ababa milkshed, central Ethiopia.

| **Characteristics** | | **Total (%)** | **bTB status** | | | | |
| --- | --- | --- | --- | --- | --- | --- | --- |
| **N (%) Positive** | **Crude OR[95% CI]** | **P value** | **Adjusted OR[95% CI]** | **P value** |
| Locations | Chancho | 68 (10.4) | 9 (3.1) | 1 |  | 1 |  |
|  | Laga-Tafo | 74 (11.3) | 27 (10.5) | 4.31[1.79-10.35] | 0.002 | 8.54[2.91-25.04] | <0.001 |
|  | Muka-Turi | 39 (6.0) | 7 (2.7) | 1.64[0.54-4.94] | 0.378 | - | - |
|  | Sandafa | 336 (51.4) | 164 (63.8) | 4.46[1.97-10.05] | <0.001 | 5.58[2.01-15.45] | <0.001 |
|  | Sululta | 137 (20.9) | 51 (19.8) | 7.15[3.32-15.42] | <0.001 | 12.96[4.94-34.00] | <0.001 |
| Sex | Male | 80 (12.2) | 16 (6.2) | 1 |  | - | - |
|  | Female | 574 (87.8) | 241 (93.8) | 2.89[1.63-5.13] | <0.001 | - | - |
| Breed | Zebu | 27 (4.1) | 2 (0.8) | 1 |  | 1 |  |
|  | Cross breed | 613 (93.7) | 253 (98.4) | 8.78[2.06-37.42] | 0.003 | 6.15[1.26-26.98] | 0.025 |
|  | HF | 14 (2.1) | 2 (0.8) | 2.08[0.26-16.63] | 0.489 | - | - |
| Body condition | Good | 93 (14.2) | 21 (8.2) | 1 |  | 1 |  |
| Medium | 411 (62.8) | 118 (45.9) | 1.38[0.81-2.35] | 0.234 | - | - |
| Poor | 150 (22.9) | 118 (45.9) | 12.64[6.77-23.58] | <0.001 | 12.38[5.96-25.73] | <0.001 |
| Farm type | Traditional | 333 (50.9) | 64 (24.9) | 1 |  | 1 |  |
| Commercial | 321 (49.1) | 193 (75.1) | 6.34[4.46-9.02] | <0.001 | 9.33[4.65-18.68] | <0.001 |
| Management condition | Good | 108 (16.5) | 64 (24.9) | 1 |  | 1 |  |
| Medium | 268 (41.0) | 133 (51.8) | 3.29[2.29-4.76] | <0.001 | 1.86[1.13-3.08] | 0.016 |
| Poor | 278 (42.5) | 64 (24.9) | 4.18[2.61-6.69] | <0.001 | - | - |
| Herd size | <10 animals | 95 (14.5) | 13 (5.1) | 1 |  | - | - |
|  | 11-50 animals | 273 (41.7) | 76 (29.6) | 2.43[1.28-4.63] | 0.007 | - | - |
|  | >50 animals | 286 (43.7) | 168 (65.4) | 8.98[4.78-16.87] | <0.001 | - | - |
