# Supplementary material for: Epidemiology of Bovine Tuberculosis and Its Zoonotic Implication in Addis Ababa Milkshed, Central Ethiopia
Source: Frontiers journal article supplement (doi:10.3389/fvets.2021.595511), 2021-02-17
Supplement: Table_4.DOCX [file Table_4.DOCX]

Table 4: Owners or farm mangers awareness about bTB and bTB mode of transmission among dairy farm owners.

| Questions | **Yes (%)** | **No (%)** |
| --- | --- | --- |
| Know bTB | 45 (69.2) | 20 (30.8) |
| Know bTB is zoonotic | 27 (41.5) | 38 (58.5) |
| Eat raw meat | 54 (83.1) | 11 (16.9) |
| Drink raw milk | 56 (86.2) | 9 (13.8) |
| Sharing rooms with animals | 57 (87.7) | 8 (12.3) |
| History of TB in a family or workers | 9 (13.8) | 56 (86.2) |
